# Supplementary material for: ‘Just an extra pair of hands’? A qualitative study of obstetric service users’ and professionals’ views towards 24/7 consultant presence on a single UK tertiary maternity unit
Source: PubMed Central journal article supplement — BMJ Open. 2018 Mar 6;8(3):e019977. doi: 10.1136/bmjopen-2017-019977 (PMC5855205; doi:10.1136/bmjopen-2017-019977), 2018-03-06
Supplement: bmjopen-2017-019977supp002.pdf [file bmjopen-2017-019977supp002.pdf]

## Appendix S2. Semi-structured interview schedule for professionals

### Opening Statement:

**Thank you for participating in this research study investigating staff views towards 24-7 consultant presence at St. Mary's Hospital. My name is Holly Reid and I am a research assistant at the University of Manchester. Through this research we aim to describe the effect that 24-7 consultant presence has on staff's clinical work. Do you have any questions?**

1. How long have you been in your current role?
2. Could you tell me about how consultants are involved in your work?  
or  
Could you tell me about your duties as a consultant?
3. How aware are you of 24-7 consultant presence on the maternity unit?
  - If they are not aware: **24-7 consultant presence was introduced to St. Mary's Hospital on 1<sup>st</sup> September 2014 and ensures that a consultant is available 24 hours a day 7 days a week on the maternity unit.**
  - When/where did you hear about it?
4. How do you feel about 24-7 consultant presence on the unit?
  - Why?
  - Have you ever felt differently? Why?
5. Has 24-7 consultant presence changed your work in any way?
  - How has your work changed?
6. Could you tell me about any aspects of others' work that may have changed as a result of 24-7 consultant presence?
  - Work/life balance?
  - Dynamics of multidisciplinary team?
7. Could you tell me about any aspects of patient care that may have changed as a result of 24-7 consultant presence?
  - Mother and baby?
  - Family of mother and baby?
  - Antenatal vs. postnatal?
